# Supplementary material
Source: Copernicus journal article supplement (doi:10.5194/bg-23-2815-2026)
Supplement: Supplementary file 1 [file bg-23-2815-2026-supplement.pdf]

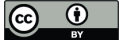

*Supplement of*

## **A top-down evaluation of bottom-up estimates to reduce uncertainty in methane emissions from Arctic wetlands**

**Luana S. Basso et al.**

*Correspondence to:* Luana S. Basso ([lbasso@bgc-jena.mpg.de](mailto:lbasso@bgc-jena.mpg.de))

The copyright of individual parts of the supplement might differ from the article licence.

Table S1. Details of monitoring sites with CH<sub>4</sub> observations data used in the inverse model.

| <b>Code</b> | <b>Latitude</b> | <b>Longitude</b> | <b>Time-period</b> |
|-------------|-----------------|------------------|--------------------|
| ABT         | 49.01° N        | 122.34° W        | 2014 - 2020        |
| ALF         | 8.92° S         | 56.79° W         | 2010 - 2018        |
| ALT         | 82.45° N        | 62.50° W         | 2000 - 2021        |
| AMB         | 69.62° N        | 162.30° E        | 2014 - 2021        |
| AMT         | 45.03° N        | 68.68° W         | 2008 - 2021        |
| AMY         | 36.54° N        | 126.33° E        | 2013 - 2021        |
| ARH         | 77.83° S        | 162.20° E        | 2000 - 2021        |
| ASC         | 7.97° S         | 14.40° W         | 2000 - 2021        |
| ASK         | 23.26° N        | 5.63° E          | 2000 - 2021        |
| ATT         | 2.14° S         | 58.99° W         | 2012 -2019         |
| AZR         | 38.76° N        | 27.29° W         | 2000 - 2021        |
| AZV         | 54.71° N        | 73.03° W         | 2009 - 2021        |
| BCK         | 62.8° N         | 115.92° W        | 2010 - 2021        |
| BHD         | 41.41° S        | 174.87° E        | 2000 - 2021        |
| BIK         | 53.22° N        | 23.01° E         | 2005 - 2021        |
| BIS         | 44.38° N        | 1.23° W          | 2009 - 2021        |
| BKT         | 0.20° S         | 100.32° E        | 2004 - 2021        |
| BLK         | 64.33° N        | 96.01° W         | 2017 - 2019        |
| BMW         | 32.26° N        | 64.88° W         | 2000 - 2021        |
| BRA         | 50.20° N        | 104.71° W        | 2009 - 2021        |
| BRW         | 71.34° N        | 156.64° W        | 2000 - 2021        |
| BRZ         | 56.15° N        | 84.33° E         | 2008 - 2019        |
| CBA         | 55.21° N        | 162.72° W        | 2000 - 2021        |
| CBW         | 51.97° N        | 4.93° E          | 2000 - 2021        |
| CBY         | 69.13° N        | 105.06° W        | 2012 - 2021        |
| CFA         | 19.28° N        | 147.06° E        | 2000 - 2021        |
| CGO         | 40.68° S        | 144.69° E        | 2000 - 2021        |
| CHL         | 58.74° N        | 93.82° W         | 2011 - 2021        |
| CHR         | 1.70° N         | 157.17° W        | 2000 - 2020        |
| CIB         | 41.81° N        | 4.93° W          | 2009 - 2021        |
| CMN         | 44.19° N        | 10.70° E         | 2008 - 2021        |
| COI         | 43.16° N        | 145.50° E        | 2000 - 2021        |
| CPA         | 42.64° N        | 77.07° E         | 2016 - 2021        |
| CPS         | 49.82° N        | 74.98° W         | 2011 - 2021        |
| CPT         | 34.35° S        | 18.49° E         | 2000 - 2021        |
| CRV         | 64.99° N        | 147.60° W        | 2011 - 2021        |
| CRZ         | 46.43° S        | 51.85° E         | 2000 - 2021        |
| CVO         | 16.86° N        | 24.87° W         | 2007 - 2021        |
| CYA         | 66.28° S        | 110.52° E        | 2000 - 2021        |

|     |          |           |             |
|-----|----------|-----------|-------------|
| DEM | 59.79° N | 10.87° E  | 2005 - 2021 |
| DIK | 73.51° N | 80.52° E  | 2018 - 2021 |
| DRP | 59.16° S | 62.59° W  | 2006 - 2021 |
| DSI | 20.69° N | 116.73° E | 2010 - 2021 |
| EGB | 44.23° N | 79.78° W  | 2005 - 2021 |
| EIC | 27.15° S | 109.45° W | 2000 - 2019 |
| ESP | 49.38° N | 126.54° W | 2009 - 2021 |
| EST | 51.67° N | 110.21° W | 2010 - 2021 |
| ETL | 54.35° N | 104.99° W | 2005 - 2021 |
| FNE | 58.84° N | 122.57° W | 2014 - 2021 |
| FSD | 49.88° N | 81.57° W  | 2000 - 2021 |
| GAT | 53.07° N | 11.44° E  | 2016 - 2021 |
| GMI | 13.39° N | 144.66° E | 2000 - 2021 |
| GPA | 12.25° S | 131.04° E | 2010 - 2019 |
| HAT | 24.06° N | 123.81° E | 2000 - 2021 |
| HBA | 75.61° S | 26.21° W  | 2000 - 2021 |
| HNP | 43.61° N | 79.39° W  | 2014 - 2021 |
| HPB | 47.80° N | 11.02° E  | 2006 - 2021 |
| HSU | 41.05° N | 124.60° W | 2008 - 2017 |
| HTM | 56.10° N | 13.42° E  | 2016 - 2021 |
| HUN | 46.95° N | 16.65° W  | 2000 - 2021 |
| ICE | 63.39° N | 20.29° W  | 2000 - 2021 |
| INU | 68.32° N | 133.53° W | 2012 - 2021 |
| IPR | 45.81° N | 8.63° E   | 2017 - 2021 |
| IZO | 28.31° N | 16.49° W  | 2000 - 2021 |
| JFJ | 46.55° N | 7.98° E   | 2007 - 2021 |
| KAS | 49.23° N | 19.98° E  | 2000 - 2021 |
| KEY | 25.61° N | 80.20° W  | 2000 - 2021 |
| KJN | 70.85° N | 29.22° E  | 2014 - 2021 |
| KRE | 49.58° N | 15.08° E  | 2017 - 2021 |
| KRS | 58.25° N | 82.42° E  | 2004 - 2021 |
| KUM | 19.52° N | 154.82° W | 2000 - 2021 |
| LAU | 45.03° S | 169.67° E | 2009 - 2021 |
| LEF | 45.95° N | 90.27° W  | 2010 - 2021 |
| LEW | 40.94° N | 76.88° W  | 2013 - 2021 |
| LIN | 52.17° N | 14.12° E  | 2015 - 2021 |
| LLB | 54.95° N | 112.45° W | 2007 - 2021 |
| LLN | 23.46° N | 120.86° E | 2006 - 2021 |
| LMP | 35.52° N | 12.63° E  | 2008 - 2021 |
| LUT | 53.40° N | 6.35° E   | 2006 - 2021 |
| MAA | 67.62° S | 62.87° E  | 2000 - 2021 |

|     |          |           |             |
|-----|----------|-----------|-------------|
| MBO | 43.98° N | 121.69° W | 2011 - 2021 |
| MEX | 18.98° N | 97.31° W  | 2009 - 2021 |
| MHD | 53.33° N | 9.89° W   | 2000 - 2021 |
| MID | 28.22° N | 177.37° W | 2000 - 2021 |
| MKN | 0.06° S  | 37.30° E  | 2003 - 2011 |
| MLO | 19.53° N | 155.58° W | 2000 - 2021 |
| MNM | 24.29° N | 153.98° E | 2000 - 2021 |
| MQA | 54.48° S | 158.97° E | 2000 - 2021 |
| MSH | 41.66° N | 70.50° W  | 2016 - 2021 |
| MWO | 34.22° N | 118.06° W | 2010 - 2021 |
| NAT | 5.51° S  | 35.26° W  | 2010 - 2020 |
| NMB | 23.58° S | 15.03° E  | 2000 - 2021 |
| NOR | 60.09° N | 17.48° E  | 2017 - 2021 |
| NOY | 63.43° N | 75.78° E  | 2005 - 2016 |
| NWP | 4.09° S  | 152.2° E  | 2000 - 2017 |
| NWR | 40.05° N | 105.63° W | 2000 - 2021 |
| OHP | 43.92° N | 5.75° E   | 2014 - 2021 |
| OPE | 48.56° N | 5.5° E    | 2011 - 2021 |
| OXK | 50.03° N | 11.81° E  | 2003 - 2021 |
| PAL | 67.97° N | 24.12° E  | 2004 - 2021 |
| PDI | 21.57° N | 103.52° E | 2014 - 2020 |
| PDM | 42.94° N | 0.14° E   | 2014 - 2021 |
| POC | 1.31° S  | 114.59° W | 2000 - 2017 |
| PRS | 45.93° N | 7.70° W   | 2005 - 2021 |
| PSA | 64.77° S | 64.05° W  | 2000 - 2021 |
| PUI | 62.91° N | 27.65° E  | 2016 - 2021 |
| PUY | 45.77° N | 2.97° E   | 2011 - 2021 |
| RBA | 9.36° S  | 67.62° W  | 2010 - 2018 |
| RGL | 52.00° N | 2.54° W   | 2012 - 2021 |
| RPB | 13.16° N | 59.43° W  | 2000 - 2021 |
| RUN | 21.08° S | 55.38° E  | 2014 - 2021 |
| RYO | 39.03° N | 141.82° E | 2000 - 2021 |
| SAC | 48.72° N | 2.14° E   | 2015 - 2021 |
| SAN | 2.85° S  | 54.95° W  | 2004 - 2018 |
| SCT | 33.41° N | 81.83° W  | 2015 - 2021 |
| SEY | 4.68° S  | 55.53° E  | 2000 - 2021 |
| SGP | 36.61° N | 97.49° W  | 2002 - 2021 |
| SHM | 52.72° N | 174.12° E | 2000 - 2021 |
| SIS | 59.85° N | 1.27° W   | 2003 - 2021 |
| SMO | 14.24° S | 170.56° W | 2000 - 2021 |
| SMR | 61.85° N | 24.29° E  | 2015 - 2021 |

|     |          |           |             |
|-----|----------|-----------|-------------|
| SPO | 89.98° S | 24.80° W  | 2000 - 2021 |
| STR | 37.76° N | 122.45° W | 2007 - 2014 |
| SUM | 72.59° N | 38.42° W  | 2000 - 2021 |
| SVB | 64.26° N | 19.77° E  | 2017 - 2021 |
| SVV | 51.33° N | 82.13° E  | 2007 - 2014 |
| SYO | 69.01° S | 39.58° E  | 2000 - 2021 |
| TAB | 5.98° S  | 69.70° W  | 2010 - 2012 |
| TAC | 52.52° N | 1.14° E   | 2013 - 2021 |
| TAP | 36.73° N | 126.13° E | 2000 - 2021 |
| TEF | 3.70° S  | 66.50° W  | 2013 - 2018 |
| TER | 69.20° N | 35.10° E  | 2000 - 2021 |
| THD | 41.05° N | 124.15° W | 2002 - 2017 |
| TIK | 71.59° N | 128.89° E | 2011 - 2018 |
| TLL | 30.17° S | 70.80° W  | 2013 - 2021 |
| TOH | 51.81° N | 10.53° E  | 2017 - 2021 |
| TPD | 42.64° N | 80.56° W  | 2012 - 2021 |
| TRN | 47.96° N | 2.11° E   | 2007 - 2021 |
| ULD | 37.48° N | 130.9° E  | 2014 - 2021 |
| USH | 54.85° S | 68.31° W  | 2000 - 2021 |
| UTA | 39.90° N | 113.72° W | 2000 - 2021 |
| UTO | 59.78° N | 21.37° E  | 2012 - 2021 |
| UUM | 44.45° N | 111.10° E | 2000 - 2021 |
| VGN | 54.50° N | 62.32° E  | 2008 - 2021 |
| WBI | 41.72° N | 91.35° W  | 2007 - 2021 |
| WGC | 38.26° N | 121.49° W | 2007 - 2021 |
| WIS | 30.86° N | 34.78° E  | 2000 - 2021 |
| WKT | 31.31° N | 97.33° W  | 2001 - 2021 |
| WLG | 36.27° N | 100.92° E | 2000 - 2021 |
| WSA | 43.93° N | 60.01° W  | 2003 - 2021 |
| YON | 24.47° N | 123.01° E | 2000 - 2021 |
| ZEP | 78.91° N | 11.89° E  | 2000 - 2021 |
| ZOT | 60.80° N | 89.35° E  | 2006 - 2021 |
| ZSF | 47.42° N | 10.98° E  | 2002 - 2021 |

---

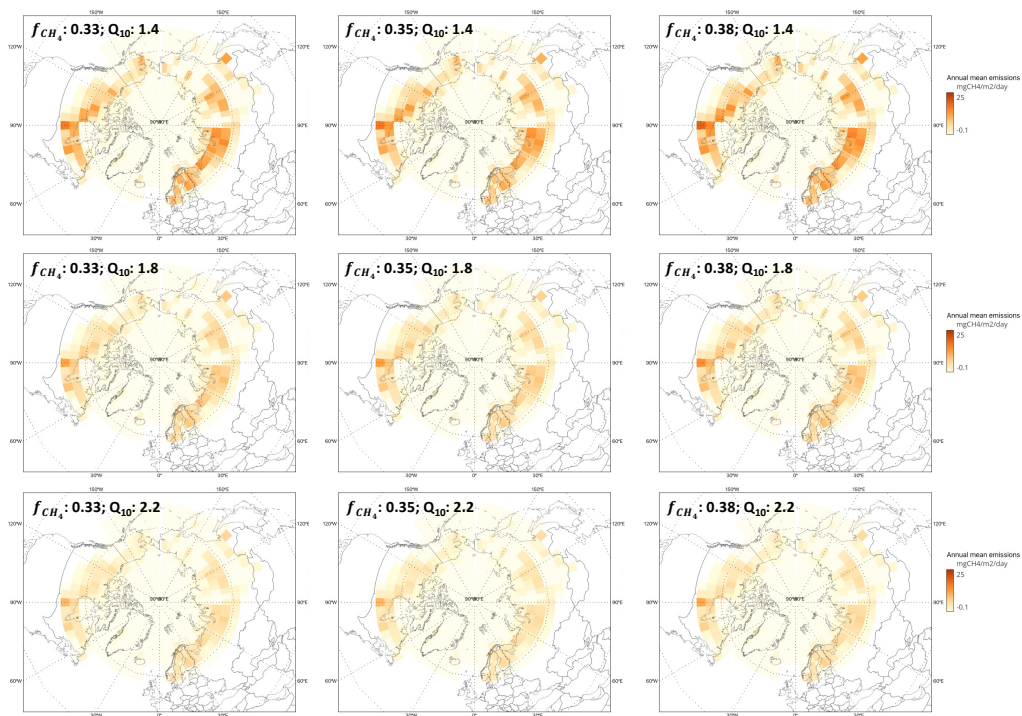

Figure S1. Annual mean wetland prior  $\text{CH}_4$  emissions (between 2010-2021) from nine JSBACH sensitivity experiments, each using different values of the  $Q_{10}$  parameter and the baseline  $f_{\text{CH}_4}$  fraction.

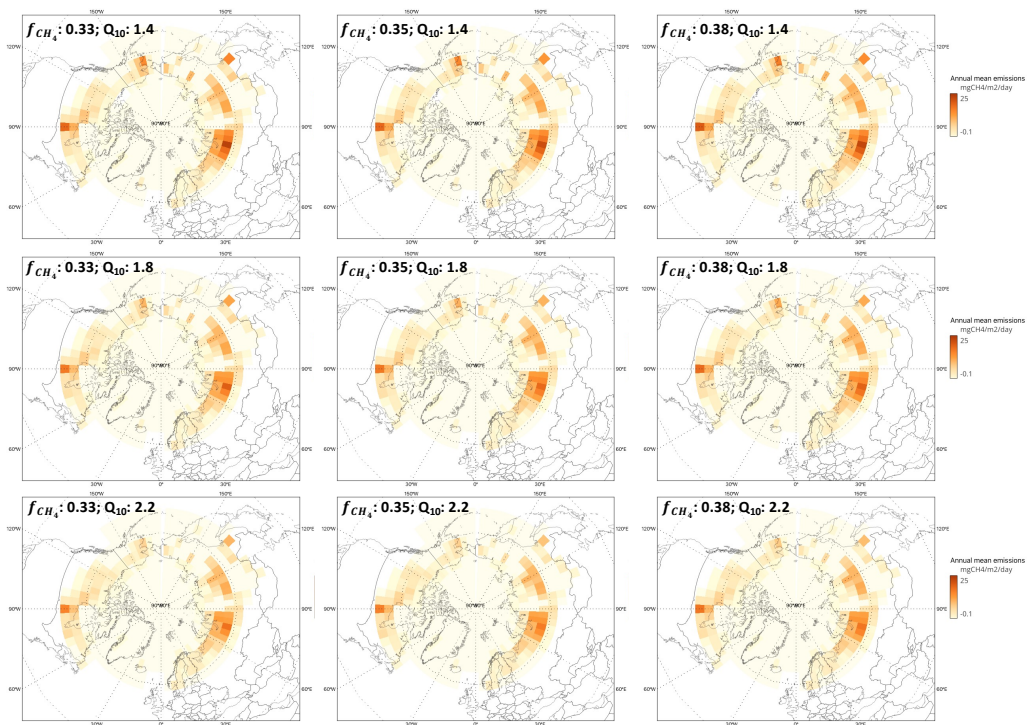

Figure S2. Annual mean posterior CH<sub>4</sub> emissions from wetlands (between 2010-2021) estimated from atmospheric inversions using nine JSBACH sensitivity experiments, each using the different JSBACH wetland emissions with different values of the  $Q_{10}$  parameter and the baseline  $f_{CH_4}$  fraction as wetland prior flux.
